# Supplementary material for: Single-Cell Sequencing Confirms Transcripts and VHDJH Rearrangements of Immunoglobulin Genes in Human Podocytes
Source: MDPI journal article supplement (doi:10.3390/genes12040472), 2021-03-25
Supplement: s1 [file s1]

Table SI. Clinicopathologic features of 10 patients used in this study.

| Case number | Age/Sex | Blood pressure (mmHg) | proteinuria (g/d) | Serum creatinine ( $\mu\text{mol/L}$ ) | eGFR (ml/min/1.73m <sup>2</sup> ) | Erythrocyturia (0 to 5+) |
|-------------|---------|-----------------------|-------------------|----------------------------------------|-----------------------------------|--------------------------|
| MN1         | 28/M    | 116/78                | 10                | 61                                     | 129                               | 1                        |
| MN2         | 49/M    | 143/100               | 7.3               | 72                                     | 104                               | 2                        |
| MN3         | 30/M    | 130/66                | 7.4               | 67                                     | 123                               | 2                        |
| IgAN1       | 30/F    | 105/60                | 1.1               | 61                                     | 117                               | 3                        |
| IgAN2       | 29/F    | 114/60                | 1.8               | 41                                     | 135                               | 2                        |
| IgAN3       | 24/F    | 131/93                | 4.3               | 98                                     | 70                                | 3                        |
| IgAN4       | 41/F    | 120/75                | 1.2               | 60                                     | 109                               | 3                        |
| IN          | 32/M    | 143/97                | 2.9               | 162                                    | 48                                | 3                        |
| HC          | 38/M    | 114/76                | ND                | 82                                     | 105                               | 3                        |
| HC-10×G     | 48/M    | 130/86                | ND                | 100                                    | 80                                | 2                        |

Abbreviations: MN, membranous nephropathy; IgAN, immunoglobulin A nephropathy; IN, ischemic nephropathy; HC, healthy control; F, female; M, male; ND, not detected; HC-10×G, healthy control used for 10×Genomics Chromium system.

Table SII. Primers used in this study.

| Gene                                     | Primer                            | Primer sequence 5'-3'   |
|------------------------------------------|-----------------------------------|-------------------------|
| Ig heavy chain constant region           | Antisense primer (IGHGc-R1)       | GAGTCCTGAGGACTGTAGGACAG |
|                                          | Antisense primer (IGHAc-R1)       | TTCGCTCCAGGTCACACTGAG   |
|                                          | Antisense primer (IGHMc-R1)       | TGATGGAGTCGGAAGGAAGTC   |
|                                          | Antisense primer (IGHDc-R1)       | GACAGTCACGGACGTTGGGT    |
|                                          | Antisense primer (IGHEc-R1)       | AGAGTCACGGAGGTGGCATTG   |
| Ig variable region (2 <sup>nd</sup> PCR) | Internal sense primer (VH-FR2)    | TGGRTCCGVCAGSCYCCNGG    |
|                                          | Internal antisense primer (JH)    | AACTGCAGAGGAGACGGTGACC  |
| podocyte specific marker genes           | External sense primer (NPHS1)     | GGTGCAGTTTCCCCAACTA     |
|                                          | External antisense primer (NPHS1) | AGAAGGAGCTCACGGTTTCG    |
|                                          | Internal sense primer (NPHS1)     | CCGGGAGACGCCTTAACTT     |
|                                          | Internal antisense primer (NPHS1) | GAGCCTTTGAATGGGGCTCT    |
|                                          | External sense primer (NPHS2)     | GGTACCAAATCCTCCGGCTTA   |
|                                          | External antisense primer (NPHS2) | CCTTTGCATCTTGGGCGATG    |
|                                          | Internal sense primer (NPHS2)     | GTGGCTTCTTGTCTCATTTC    |
|                                          | Internal antisense primer (NPHS2) | CAGTGAGGGATCGATGTGCT    |
| B cell marker gene                       | External sense primer (CD19)      | GAGGGAGATAGGCACGGATGG   |
|                                          | External antisense primer (CD19)  | AACATTGCTCCAGAGGTTGGC   |
|                                          | Internal sense primer (CD19)      | GTGGCTACTGGCTTTCAGG     |
|                                          | Internal antisense primer (CD19)  | CAGGTGTGAATCTTGGGGACTT  |

Table SIII. The detection rate of Ig<sup>+</sup> single podocytes and five classes of Ig heavy chains.

| Case  | No.of<br>single<br>cells | Ig <sup>+</sup> single<br>podocytes<br>(ratio) | podocyte-derived Ig class(ratio) |                  |                 |                 |                |
|-------|--------------------------|------------------------------------------------|----------------------------------|------------------|-----------------|-----------------|----------------|
|       |                          |                                                | IgG                              | IgM              | IgA             | IgE             | IgD            |
| HC    | 32                       | 6/32<br>(18.8%)                                | 3/6<br>(50%)                     | 3/6<br>(50%)     | 0               | 0               | 0              |
| IgAN  | 120                      | 15/120<br>(12.5%)                              | 14/15<br>(93.3%)                 | 5/15<br>(33.3%)  | 1/15<br>(6.7%)  | 0               | 0              |
| MN    | 60                       | 18/60<br>(30%)                                 | 9/18<br>(50%)                    | 15/18<br>(83.3%) | 3/18<br>(16.7%) | 0               | 0              |
| IN    | 23                       | 9/23<br>(39.1%)                                | 3/9<br>(33.3%)                   | 4/9<br>(44.4%)   | 2/9<br>(22.2%)  | 5/9<br>(55.6%)  | 2/9<br>(22.2%) |
| Total | 235                      | 48/235<br>(20.4%)                              | 29/48<br>(60.4%)                 | 27/48<br>(56.3%) | 6/48<br>(12.5%) | 5/48<br>(10.4%) | 2/48<br>(4.2%) |

Table SIV. Rate of functional rearrangement in 429 V<sub>H</sub>DJ<sub>H</sub> rearrangements.

| sample<br>origin | Ig<br>class | No. of<br>single cell | No. of<br>clone | No. of<br>functional V <sub>H</sub> DJ <sub>H</sub><br>rearrangement | No. of<br>non-functional V <sub>H</sub> DJ <sub>H</sub><br>rearrangement (%) |
|------------------|-------------|-----------------------|-----------------|----------------------------------------------------------------------|------------------------------------------------------------------------------|
| HC               | γ chain     | 3                     | 20              | 20                                                                   | 0                                                                            |
|                  | μ chain     | 3                     | 17              | 17                                                                   | 0                                                                            |
| IgAN             | α chain     | 1                     | 5               | 5                                                                    | 0                                                                            |
|                  | γ chain     | 14                    | 75              | 68                                                                   | 7 (9.3%)                                                                     |
|                  | μ chain     | 5                     | 28              | 26                                                                   | 2 (7.1%)                                                                     |
| MN               | α chain     | 3                     | 27              | 26                                                                   | 1 (3.7%)                                                                     |
|                  | γ chain     | 9                     | 66              | 65                                                                   | 1 (1.5%)                                                                     |
|                  | μ chain     | 15                    | 83              | 83                                                                   | 0                                                                            |
| IN               | α chain     | 2                     | 13              | 13                                                                   | 0                                                                            |
|                  | γ chain     | 5                     | 24              | 19                                                                   | 5 (20.8%)                                                                    |
|                  | μ chain     | 4                     | 25              | 24                                                                   | 1 (4%)                                                                       |
|                  | δ chain     | 2                     | 14              | 14                                                                   | 0                                                                            |
|                  | ε chain     | 5                     | 32              | 31                                                                   | 1 (3.1%)                                                                     |
|                  | total       | 71                    | 429             | 411                                                                  | 18 (4.2%)                                                                    |

Abbreviations: HC, healthy control; IgAN, immunoglobulin A nephropathy; MN, membranous nephropathy; IN, ischemic nephropathy

Table SV. The V<sub>H</sub>DJ<sub>H</sub> rearrangement patterns of Ig heavy chains variable region in 48 single podocytes.

| Cases No. | Cell No. | Ig type | V <sub>H</sub> DJ <sub>H</sub> recombination | CDR3 sequence                                                     | Clones |
|-----------|----------|---------|----------------------------------------------|-------------------------------------------------------------------|--------|
| HC        | HC-1     | μ chain | IGHV4-39/IGHD1-1/IGHJ3                       | GCGAGACACCAGATCATTCCCCAACTGGGTGATGCTTTTGATATC                     | 7/7    |
|           | HC-2     | γ chain | IGHV1-2/IGHD3-3/IGHJ6                        | GCGAGAGGGGGTCATAGGTACGATGATTACTATTACTACTACGGTATGGACGTC            | 6/6    |
|           | HC-3     | γ chain | IGHV5-51/IGHD3-16/IGHJ4                      | GCGAGATGGAATGTTATGATTGGATTTTATACAGCTGACTAC                        | 1/9    |
|           |          |         | IGHV7-4/IGHD3-10/IGHJ4                       | GCGGTGGGGGTAGCCTATGGTTCGGGGAGCTCCTTTGACTAC                        | 8/9    |
|           | HC-4     | μ chain | IGHV3-7/IGHD2-8/IGHJ4                        | ACGGGACAGCCGAGAATGCTGGCCCAC                                       | 1/5    |
|           |          |         | IGHV3-7/IGHD1-1/IGHJ4                        | ACGGGACAGCCGAGAACGCTGGCCCAC                                       | 4/5    |
|           | HC-5     | γ chain | IGHV1-24/IGHD2-15/IGHJ4                      | GCAACTTGTGATGGTAGCTGCTACTCACCCGATCCGACCTTTCAC TTC                 | 5/5    |
| IgAN2     | HC-6     | μ chain | IGHV1-18/IGHD2-2/IGHJ6                       | GCGAGAGATCTGGATATTGTAGTAGTAGCAGCTGCTACTCGCTACTACGGTTTGGACGTC      | 5/5    |
|           | IgAN1    | γ chain | IGHV3-48/IGHD6-19/IGHJ5                      | GCGAGAGGGTATAAAAGTGGCTACTATGGTGCC                                 | 11/11  |
|           | IgAN2-1  | γ chain | IGHV1-24/IGHD2-15/IGHJ4                      | GCAACTTGTGATGGTAGCTGCTACTCACCCGATCCGACCTTTCAC TTC                 | 4/4    |
|           | IgAN2-2  | γ chain | IGHV3-48/IGHD3-3/IGHJ4                       | GCGAGATCGTCAAGAGGAGTGGGCATTGACTAT                                 | 5/5    |
|           |          | μ chain | IGHV3-74/IGHD5-18/IGHJ4                      | GCAAGAGCCCCCCCCGGGTAGTTTCACTGGATACCATTTCGACTAC                    | 4/6    |
|           |          |         | IGHV3-23/IGHD6-13/IGHJ2                      | GCGAAAGCTGTGGCAGCAGATGGTCTCTGGTACTTCGATCTC                        | 2/6    |
|           | IgAN2-3  | γ chain | IGHV1-18/IGHD6-19/IGHJ5                      | GCGAGAGATGATTCTGTCCACAGGGTATCTCAGTGGCTGGTCTTCGTCCAAC TGGCTCGACCCC | 1/5    |
|           |          |         | IGHV1-24/IGHD2-2/IGHJ3                       | GCAACATCGGATCCTGAGATACTTCCAGCTGCTCGCTGGGGTGAGGCTTTTGATGTC         | 2/5    |
|           |          |         | IGHV3-23/IGHD1-14/IGHJ4                      | GTAAAACAAAAGTACTTTGATTTCGACGAATAAGAATAACCGAGTTTTTGATGTC           | 2/5    |
|           |          | γ chain | IGHV3-53/IGHD3-10/IGHJ6                      | GCCAGAGATCGTTACTACTTTGGTTTCGGGGAGTTACCCCTGGCCCTCTTAGCTATGGACGTC   | 3/3    |
|           | IgAN2-4  | γ chain | IGHV3-53/IGHD3-10/IGHJ6                      | GCCAGAGATCGTTACTACTTTGGTTTCGGGGAGTTACCCCTGGCCCTCTTAGCTATGGACGTC   | 3/3    |
|           | IgAN2-5  | γ chain | IGHV1-8/IGHD1-1/IGHJ4                        | GCGAGAGGCCCGCGCCTAAGCGCAACTGGTACGAGTAGGTTTCGTTCTGGCCTTC           | 5/5    |
|           | IgAN2-6  | α chain | IGHV3-23/IGHD6-13/IGHJ4                      | GCGAAAGCGATGAGCAGCAGCAGCCGATACGTCCTTTGACTAC                       | 5/5    |
|           | IgAN2-7  | γ chain | IGHV4-39/IGHD3-16/IGHJ4                      | GCGAGACACTCGGAAAGGGGGAGTTCATACTTTGACTAC                           | 4/4    |

| Cases No. | Cell No.           | Ig type | V <sub>H</sub> DJ <sub>H</sub> recombination | CDR3 sequence                                                              | Clones |
|-----------|--------------------|---------|----------------------------------------------|----------------------------------------------------------------------------|--------|
| IgAN2     | IgAN2-8            | γ chain | IGHV3-23/IGHD6-13/IGHJ4                      | GCGAAACCTCATAGTAGCAGCTCTGGTTTTGACTAC                                       | 1/3    |
|           |                    |         | IGHV1-8/IGHD5-12/IGHJ4                       | GCGAGGGGCTCCAGACTTAGTGGCCACGATGCGGCCGGGACATTTGACTAC                        | 1/3    |
|           |                    |         | IGHV7-4-1/IGHD5-12/IGHJ5                     | GCGAGGACCACGATTACCAACAGCTGGGCGAGGTGGTTCGACCCC                              | 1/3    |
|           |                    | μ chain | IGHV1-18/IGHD3-3/IGHJ6                       | GCGAGAGATCGACAGTACGATTTTTGGAGTGGTTCCTACTACTACTACTACATGGACGTC               | 3/4    |
|           |                    |         | IGHV4-34/IGHD3-10/IGHJ6                      | GCGGGAACGGGGAGGCGCTACTACTACGGTATGGACGTC                                    | 1/4    |
|           | IgAN2-9            | γ chain | IGHV4-59/IGHD3-22/IGHJ3                      | GCGGGGGATCGTTCATACTATGATAGCCGGAGTTTTTACCCTGATGCTCTTGATATC                  | 5/5    |
|           |                    | μ chain | IGHV3-53/IGHD6-19/IGHJ4                      | ACTGGAGATGATGGAACGTATAGCAGTGGCTGGTACCACGGCTAC                              | 4/4    |
| IgAN3     | IgAN3-1            | γ chain | IGHV4-59/IGHD3-22/IGHJ3                      | GCGAGGGATCGTTCATACTATGATAGCCGGAGTTTTTACCCTGATGCTCTTGATATC                  | 5/5    |
|           |                    | μ chain | IGHV5-51/IGHD3-16/IGHJ4                      | GCGGGATGGAATGTTATGATTGGATTTTATACAGCTGACTAC                                 | 2/2    |
|           |                    |         | IGHV3-7/IGHD2-21/IGHJ4                       | GCGAGGAGTGATTGGGGGCCTGACTAC                                                | 3/8    |
|           |                    |         | IGHV3-74/IGHD5-18/IGHJ4                      | GCAAGAGCCCCCCCCGGGTAGTTTCACTGGATAACCATTTGACTAC                             | 1/8    |
|           |                    |         | IGHV4-61/IGHD2-21/IGHJ5                      | GCGAGAGCGGATTGTGGTCGTGCTGGCTGTTACACCCCATTTTACAACCTGGTTCGACCCC              | 4/8    |
| IgAN4     | IgAN3-2            | γ chain | IGHV3-23/IGHD6-13/IGHJ1                      | GCGAAAGACCGTGGGCGAATAGGAGCACCTGGTACTCTCGTCGTCGCCGTGAAACCCTCTGATACTTCCAACAT | 6/6    |
|           | IgAN4-1<br>IgAN4-2 | γ chain | IGHV1-18/IGHD3-9/IGHJ6                       | GCGAGAGTCTTAGTGGTTCACGATCCTTTGACTGGTTACCACTACAGTATGGACGTC                  | 5/5    |
|           |                    | μ chain | IGHV3-23/IGHD3-3/IGHJ5                       | GCGAACATAATGTATTGGCAGCCTGAATCC                                             | 1/4    |
|           |                    |         | IGHV3-7/IGHD3-3/IGHJ5                        | GCGAACATAATGTATTGGCAGCCTGAATCC                                             | 3/4    |
|           |                    | γ chain | IGHV1-8/IGHD3-3/IGHJ5                        | GCGAGAGGCAACCGGGGCCAGCATACTGCGATTTTTGGAGTGGTTATCCTATGGTGGTTCGACCCC         | 5/5    |

| Cases No. | Cell No. | Ig type | V <sub>H</sub> D <sub>H</sub> J <sub>H</sub> recombination | CDR3 sequence                                                             | Clones |
|-----------|----------|---------|------------------------------------------------------------|---------------------------------------------------------------------------|--------|
| MN1       | MN1-1    | γ chain | IGHV1-69/IGHD3-3/IGHJ4                                     | GCGAGAGTTCGAGGGGGGCGTATAACGATTTTGGAGGGCTTGAGTAC                           | 2/5    |
|           |          |         | IGHV3-15/IGHD2-8/IGHJ5                                     | ACCACAGGATATTGTACTGATATTAGGTGCGTCACC                                      | 3/5    |
|           |          | μ chain | IGHV1-18/IGHD5-12/IGHJ5                                    | GCGAGCACCAATAGTGGCTACGATGGGGGGCTTGGTCCC                                   | 5/5    |
|           | MN1-2    | γ chain | IGHV1-18/IGHD1-1/IGHJ4                                     | GCGAGGGACAACTTTATTTGCCCCACTGAAGGTCCCTTTGACAAC                             | 7/7    |
|           |          | μ chain | IGHV1-18/IGHD6-19/IGHJ4                                    | GCGAGAGACCTGGTTCGCGAAATAGCAGTGGCTGGTACGACGAGGAGGGGGGGCTTTGACTAC           | 2/2    |
|           | MN1-3    | γ chain | IGHV1-18/IGHD3-3/IGHJ6                                     | GCGAGAGTCTTACAGGTTACGATCCCTTGAGTGGTTACCACTGCAATATGGACGTC                  | 10/10  |
|           | MN1-4    | α chain | IGHV4-34/IGHD3-3/IGHJ1                                     | GCGAGTCCAGACGGGAGTGCTTATGCCTTCCTCTAC                                      | 1/6    |
|           |          |         | IGHV3-7/IGHD3-10/IGHJ5                                     | GTACTGTGGTTCGACATCGGAGGGAACCAC                                            | 5/6    |
|           |          | γ chain | IGHV1-46/N/A/IGHJ6                                         | GCGAGATCCAAGAACGGAATGGACGTC                                               | 5/5    |
|           |          | μ chain | IGHV3-69/IGHD3-22/IGHJ5                                    | GTGGGAGGATGCTATAGTAGTGGTTATTACTGGTTCGACCCC                                | 6/6    |
|           | MN1-5    | μ chain | IGHV3-48/IGHD2-15/IGHJ4                                    | GCGCGAGATTTAGGATATTGTAGTGGTGGTCGCTGCCCTTATTACCACCTTTGACTCC                | 3/6    |
|           |          |         | IGHV4-34/IGHD6-13/IGHJ4                                    | GCGAGGCTGTATAGCAGCAGCTGC                                                  | 3/6    |
|           | MN1-6    | γ chain | IGHV3-53/N/A/IGHJ6                                         | GCGAGATCCATGGACGTC                                                        | 8/8    |
|           |          | μ chain | IGHV1-3/IGHD6-25/IGHJ4                                     | GCGACTGTAGCAGCGTCCTTGGGGGGCTAC                                            | 7/7    |
|           | MN1-7    | μ chain | IGHV1-18/IGHD6-19/IGHJ4                                    | GCGAGAGACTCAGAAATAGCAGTGGCTGGTACAGGCGACTAC                                | 6/6    |
|           | MN1-8    | μ chain | IGHV5-51/IGHD2-15/IGHJ6                                    | GCGAGATATGGTCTGCGGGGCTGTAGTGATAAATGTTATGTTAGTTTCTACTACTACGGTATG<br>GACGTC | 4/4    |
| MN2       | MN2-1    | γ chain | IGHV3-11/IGHD4-23/IGHJ6                                    | GCGAGACTTCCTCGTGAGGTGGGAACTCCGTACTACTTCTACGGTATGGACGTC                    | 5/5    |
|           |          | μ chain | IGHV3-15/IGHD6-13/IGHJ4                                    | ACTTGGTCAAGCACCTGGTCACTCAGGTTCTACTTTGACTCC                                | 4/8    |
|           |          |         | IGHV3-64/IGHD5-12/IGHJ4                                    | GCGAGAGGGGGGCCGGGTGGTGGCTACGGAGGCCGGCTAC                                  | 2/8    |
|           |          |         | IGHV4-59/IGHD2-21/IGHJ4                                    | GCGAGAGGGGGGGAAGTGGTGACGACTAGCCCCCTCACTTTGACTAC                           | 1/8    |
|           |          |         | IGHV1-18/IGHD2-2/IGHJ4                                     | GCGAGAGACGACGCGGATGGGTTGGACGAATCAGCTTCAATTGACTAC                          | 1/8    |

| Cases No. | Cell No. | Ig type                 | V <sub>H</sub> DJ <sub>H</sub> recombination | CDR3 sequence                                                            | Clones |
|-----------|----------|-------------------------|----------------------------------------------|--------------------------------------------------------------------------|--------|
| MN2       | MN2-2    | μ chain                 | IGHV1-18/IGHD3-22/IGHJ4                      | GCGAGAACCCTTAGGCGTGAGAGTAGTGGTTATTCCCTATAC                               | 6/6    |
|           | MN2-3    | α chain                 | IGHV3-23/IGHD3-16/IGHJ4                      | GTGAAATATGGAGATTTCCTTTGGGGGGGTTATCGTTTGAACACTTTGACTAC                    | 6/6    |
|           |          | μ chain                 | IGHV3-21/IGHD3-10/IGHJ4                      | GCGAGGTATTACTATGGTTCGTGGACTTATTATAACACCTACTTTGACTAT                      | 4/4    |
|           | MN2-4    | μ chain                 | IGHV1-18/IGHD1-26/IGHJ5                      | GCGAGAGATCGGAGTGGGAGCTACCCCCCGCTTGGTGGTTCGACCCC                          | 1/6    |
|           |          |                         | IGHV3-23/IGHD3-10/IGHJ4                      | GCGAAAGGAGGGTATTACCATGGTTCGGGGAACACTTTGACTTC                             | 5/6    |
|           | MN2-5    | μ chain                 | IGHV1-18/IGHD3-22/IGHJ4                      | GCAAGACTTCAGAGTGATAGTAGTGGTTATTACCACCAACCT                               | 6/6    |
|           | MN2-6    | μ chain                 | IGHV3-9/IGHD5-24/IGHJ4                       | GCAAAAGTGGGGTATGGCTACAATTACTGGGGGCACTTTGACTAC                            | 5/5    |
|           | MN2-7    | μ chain                 | IGHV1-18/IGHD3-22/IGHJ4                      | GCGAGAGATCATGATAGTAGTGGTTATTACGAACGGTTCTTTGACTAC                         | 4/6    |
|           |          |                         | IGHV1-58/IGHD2-15/IGHJ6                      | GTGGCAGGACCATATTGTAGTGGTGGTAGCTACTACGACTCCAATTACTACTACTACTACGGTATGGACGTC | 2/6    |
|           | MN2-8    | γ chain                 | IGHV1-2/IGHD1-1/IGHJ5                        | GCGAGAGACCCTGAAGCGGGTTTGGAAAGCAACTGATAACTGGTTCGACCCC                     | 3/3    |
| μ chain   |          | IGHV3-15/IGHD3-16/IGHJ4 | GTTTGGTCAAGCACATGGTCAACTCGGTTCTACCTTGACCGC   | 5/6                                                                      |        |
|           |          | IGHV4-30/IGHD6-13/IGHJ4 | GCGCTAGCGGAAGGCAGCAGCTGGTATCTCTACGACTAC      | 1/6                                                                      |        |
| MN3       | MN3-1    | α chain                 | IGHV3-23/IGHD3-10/IGHJ3                      | GCGAGAGTCACGGAGTTTCACACTCCGCCCTCCTTTCGGGGGGATGCTTTTGATCTC                | 14/14  |
|           |          | γ chain                 | IGHV1-2/IGHD3-16/IGHJ6                       | GCGAGAGGGGGTCATAGGTATGATGATTACTATTACTACTACGGTATGGACGTC                   | 12/12  |
|           | MN3-2    | γ chain                 | IGHV1-69/IGHD2-15/IGHJ4                      | GCGACCCTAAAGGGATATTGCGGCTTTGGAAGCTGCTACTCGTTCTTTCTTGACGGCCCTGACAAC       | 10/10  |
| IN        | IN-1     | μ chain                 | IGHV4-59/IGHD3-22/IGHJ3                      | GCGAGAGATGTAACGTATGATAGTAGTGGTTATAATGCTTTTGATATC                         | 5/5    |
|           | IN-2     | ε chain                 | IGHV3-23/IGHD2-21/IGHJ4                      | GCGCGAAGGGTGACGGACTTGGGGATCCGTCAG                                        | 5/5    |
|           | IN-3     | ε chain                 | IGHV4-59/IGHD3-22/IGHJ3                      | GCGAGGGATCGTTCATACTATGATAGCCGGAGTCTTTACCCTGATGCTCTTGATATC                | 1/6    |
|           |          |                         | IGHV3-30/IGHD2-2/IGHJ6                       | GCGAAAACGAAGGGTTGTAGTCGTACCACTTGCTACTATTACGGAATGGACATC                   | 5/6    |

| Cases No. | Cell No. | Ig type | V <sub>H</sub> D <sub>H</sub> J <sub>H</sub> recombination | CDR3 sequence                                                             | Clones |
|-----------|----------|---------|------------------------------------------------------------|---------------------------------------------------------------------------|--------|
| IN        | IN-4     | γ chain | IGHV3-9/IGHD3-10/IGHJ4                                     | GCAAAAGATCTCGCCCCAACGGGGATGCTTCGGGGGCCATTTGATAAC                          | 4/4    |
|           |          | μ chain | IGHV3-7/IGHD1-26/IGHJ6                                     | GCGAGAATCGGGGGTGGGAGGTACGATGGGTACTACTACGGTCTGGACGTC                       | 9/11   |
|           |          |         | IGHV1-18/IGHD5-12/IGHJ4                                    | GCGAGATCCCTCTCATATGGTGGCTACGATTTTCGCTTAC                                  | 2/11   |
|           |          | ε chain | IGHV3-9/IGHD3-10/IGHJ4                                     | GCAAAAGATCTCGCCCCAACGGGGATGCTTCGGGGGCCATTTGATAAC                          | 8/8    |
|           | IN-5     | α chain | IGHV4-59/IGHD5-21/IGHJ6                                    | GCGAGAGATAGGCATTATGGTGGCTACGATCGGGACTACTACTACTACATGGACGTC                 | 5/6    |
|           |          |         | IGHV3-30/IGHD3-10/IGHJ4                                    | GCGAGAGCGTATTACTATGGTTCGGGGAGTTATTATTACTTTGACTAC                          | 1/6    |
|           |          | μ chain | IGHV4-59/IGHD5-21/IGHJ6                                    | GCGAGAGATAGGCATTATGGTGGCTACGATCGGGACTACTACTACTACATGGACGTC                 | 1/3    |
|           |          |         | IGHV3-30/IGHD3-10/IGHJ4                                    | GCGAGAGCGTATTACTATGGTTCGGGGAGTTATTATTACTTTGACTAC                          | 1/3    |
|           |          |         | IGHV4-34/IGHD3-10/IGHJ6                                    | GCGAGAGGGCTTGAAGGCGGGGCGCACTACTACTACATGGACGTC                             | 1/3    |
|           |          | δ chain | IGHV4-59/IGHD5-21/IGHJ6                                    | GCGAGAGATAGGCATTATGGTGGCTACGATCGGGACTACTACTACTACATGGACGTC                 | 6/9    |
|           |          |         | IGHV4-34/IGHD3-10/IGHJ6                                    | GCGAGAGGGCTTGAAGGCGGGGCGCACTACTACTACATGGACGTC                             | 2/9    |
|           |          |         | IGHV3-30/IGHD3-10/IGHJ4                                    | GCGAGAGCGTATTACTATGGTTCGGGGAGTTATTATTACTTTGACTAC                          | 1/9    |
|           |          | ε chain | IGHV3-23/IGHD2-21/IGHJ4                                    | GCGCGAAGGGTGACGGACTTGGGGATCCGTCAG                                         | 7/7    |
|           | IN-6     | α chain | IGHV1-24/IGHD5-18/IGHJ1                                    | TCTATTGGGGCTATGGCCACC                                                     | 7/7    |
|           |          | γ chain | IGHV1-69/IGHD2-15/IGHJ4                                    | GCGACCCTAAAGGGATATTGTGGCTTTGGAAGCTGCTACTCGTTCTTTCCTGACGGCCCTGACAAC        | 10/10  |
|           | IN-7     | δ chain | IGHV4-34/IGHD2-2/IGHJ6                                     | GCGAGAATTGTAGTAGTACCAGCTGCCTTCGGAAGAGGTTATTACTACTACTACTACGGTATGGAC<br>GTC | 5/5    |
|           | IN-8     | γ chain | IGHV3-7/NA/IGHJ6                                           | GTGGGGGCCTACGGTATGGACGTC                                                  | 5/5    |
|           | IN-9     | μ chain | IGHV4-34/IGHD3-22/IGHJ4                                    | GCGAGAGGCCGGTCGTATGATAATAGTGGTTATCCAAACCCCTTGGACTAC                       | 5/5    |
|           |          | ε chain | IGHV3-23/IGHD2-21/IGHJ4                                    | GCGCGAAGGGTGACGGACTTGGGGATCCGTCAG                                         | 5/5    |
